# Supplementary material
Source: publisher figshare collection journal article supplement (https://asha.figshare.com/articles/dataset/_/19611714)
Supplement: Supplementary file 1 [file 1]

**Supplemental Material S1. Baseline variables and assessment tools.**

| Category                   | Baseline variable                      | Assessment tool                                                                                |
|----------------------------|----------------------------------------|------------------------------------------------------------------------------------------------|
| Oral motor skills          | Oral function score                    | Oral and Speech Motor Control Protocol <sup>a</sup>                                            |
| Speech                     | GFTA-2 SS                              | GFTA-2 Sounds-In-Words                                                                         |
|                            | PVC                                    | Single Word Test of Polysyllables <sup>b</sup>                                                 |
|                            | PCC                                    |                                                                                                |
| Language                   | Receptive Language Index <sup>c</sup>  | CELF-P2 or CELF-3/ CELF-4                                                                      |
|                            | Expressive Language Index <sup>c</sup> |                                                                                                |
|                            | PPVT-4 SS                              | PPVT-4                                                                                         |
| Working memory             | Forward digit span SS                  | CTOPP/ CTOPP-2 Memory for Digits or TAPS-3 Number Memory Forward                               |
| CAS-related speech feature | % inconsistency                        | GFTA-2 Sounds-In-Words or DEAP Inconsistency or Single Word Test of Polysyllables <sup>b</sup> |
|                            | % lexical stress errors                | Single Word Test of Polysyllables <sup>b</sup>                                                 |

*Note.* GFTA-2 = Goldman-Fristoe Test of Articulation–Second Edition (Goldman & Fristoe, 2000); SS = standard score; PVC = percentage of vowels correct; PCC = percentage of consonants correct; CELF-P2 = Clinical Evaluation of Language Fundamentals Preschool–Second Edition, Australian and New Zealand Standardised Edition (Wiig et al., 2006); CELF-3 = Clinical Evaluation of Language Fundamentals–Third Edition (Semel et al., 1995); CELF-4 = Clinical Evaluation of Language Fundamentals–Fourth Edition, Australian Standardised Edition (Semel et al., 2006); PPVT-4 = Peabody Picture Vocabulary Test–Fourth Edition (Dunn & Dunn, 2007); CTOPP = Comprehensive Test of Phonological Processing (Wagner et al., 1999); CTOPP-2 = Comprehensive Test of Phonological Processing–Second Edition (Wagner et al., 2013); TAPS-3 = Test of Auditory Processing Skills–Third Edition (Martin & Brownell, 2005); DEAP = Diagnostic Evaluation of Articulation and Phonology (Dodd et al., 2006).

<sup>a</sup>Robbins & Klee, 1987. <sup>b</sup>Gozzard et al., 2006. <sup>c</sup>Receptive and Expressive Language Index scores are standard scores.

## References

- Dodd, B., Hua, Z., Crosbie, S., Holm, A., & Ozanne, A. (2006). *Diagnostic Evaluation of Articulation and Phonology*. The Psychological Corporation.
- Dunn, L. M., & Dunn, D. M. (2007). *Peabody Picture Vocabulary Test—Fourth Edition*. Pearson.
- Goldman, R., & Fristoe, M. (2000). *Goldman-Fristoe Test of Articulation—Second Edition*. American Guidance Service.
- Gozzard, H., Baker, E., & McCabe, P. (2006). Children’s production of polysyllabic words. *ACQuiring Knowledge in Speech, Language and Hearing*, 8(3), 113–116.
- Martin, N. A., & Brownell, R. (2005). *Test of Auditory Processing Skills—Third Edition*. Academic Therapy Publications.
- Robbins, J., & Klee, T. (1987). Clinical assessment of oropharyngeal motor development in young children. *Journal of Speech and Hearing Disorders*, 52, 271–277.  
<https://doi.org/10.1044/jshd.5203.271>
- Semel, E., Wiig, E. H., & Secord, W. A. (1995). *Clinical Evaluation of Language Fundamentals—Third Edition*. The Psychological Corporation.
- Semel, E., Wiig, E. H., & Secord, W. A. (2006). *Clinical Evaluation of Language Fundamentals, Australian Standardised Edition—Fourth Edition*. Pearson.
- Wagner, R. K., Torgesen, J. K., & Rashotte, C. A. (1999). *Comprehensive Test of Phonological Processing*. Pro-Ed.
- Wagner, R. K., Torgesen, J. K., Rashotte, C. A., & Pearson, N. A. (2013). *Comprehensive Test of Phonological Processing—Second Edition*. Pro-Ed.
- Wiig, E. H., Secord, W. A., & Semel, E. (2006). *Clinical Evaluation of Language Fundamentals Preschool, Australian and New Zealand Standardised Edition—Second Edition*. Pearson.
