# Supplementary material
Source: publisher figshare collection journal article supplement (https://asha.figshare.com/articles/dataset/_/19611714)
Supplement: Supplementary file 2 [file 1]

**Supplemental Material S3.** Quality ratings for included studies.

| Study                 | Design                                              | Quality rating tool                                       | Rating |
|-----------------------|-----------------------------------------------------|-----------------------------------------------------------|--------|
| Murray et al. (2015)  | RCT                                                 | PEDro-P Scale <sup>a</sup>                                | 8/10   |
| McCabe et al. (2020)  | RCT                                                 |                                                           | 7/10   |
| Thomas et al. (2014)  | Multiple-baseline across participants and behaviors | SCED Scale <sup>b</sup>                                   | 9/10   |
| Thomas et al. (2016)  | Multiple-baseline across participants and behaviors |                                                           | 10/10  |
| Thomas et al. (2018)  | Multiple-baseline across participants and behaviors |                                                           | 9/10   |
| McCabe et al. (2014)  | A-B                                                 |                                                           | 7/10   |
| Staples et al. (2009) | Pretest-posttest/case series                        | JBI Checklist for Quasi-Experimental Studies <sup>c</sup> | 7/9    |

*Note.* RCT = randomized controlled trial; SCED = single-case experimental design; JBI = Joanna Briggs Institute.

<sup>a</sup>Perdices et al., 2009. <sup>b</sup>Tate et al., 2008. <sup>c</sup>Joanna Briggs Institute, 2020.

## References

- Joanna Briggs Institute. (2020). *Checklist for quasi-experimental studies (non-randomized experimental studies)*. [https://joannabriggs.org/sites/default/files/2020-08/Checklist\\_for\\_Quasi-Experimental\\_Appraisal\\_Tool.pdf](https://joannabriggs.org/sites/default/files/2020-08/Checklist_for_Quasi-Experimental_Appraisal_Tool.pdf)
- Perdices, M., Savage, S., Tate, R. L., McDonald, S., & Togher, L. (2009). *Rater’s manual for between-group studies (RCTs and non-RCTs): Introduction to the Physiotherapy Evidence Database (PEDro) scale for rating methodological quality, adapted for PsycBITE (PEDro-P)*. University of Sydney.
- Tate, R. L., McDonald, S., Perdices, M., Togher, L., Schultz, R., & Savage, S. (2008). Rating the methodological quality of single-subject designs and n-of-1 trials: Introducing the Single-Case Experimental Design (SCED) Scale. *Neuropsychological Rehabilitation*, 18(4), 385–401. <https://doi.org/10.1080/09602010802009201>
