# Supplementary material
Source: publisher figshare collection journal article supplement (https://asha.figshare.com/articles/dataset/_/19611714)
Supplement: Supplementary file 3 [file 1]

**Supplemental Material S2.** Pearson's correlation coefficients for potential predictor variables.

| Independent variable                           | 1      | 2     | 3       | 4      | 5      | 6     | 7      | 8       | 9       | 10      | 11     | 12    | 13     | 14    | 15 | 16 | 17 |
|------------------------------------------------|--------|-------|---------|--------|--------|-------|--------|---------|---------|---------|--------|-------|--------|-------|----|----|----|
| 1. Age in months                               | –      |       |         |        |        |       |        |         |         |         |        |       |        |       |    |    |    |
| 2. Sex <sup>a</sup>                            | -.175  | –     |         |        |        |       |        |         |         |         |        |       |        |       |    |    |    |
| 3. Oral function score                         | .433** | -.034 | –       |        |        |       |        |         |         |         |        |       |        |       |    |    |    |
| 4. CELF Receptive Language Index               | -.197  | .325  | .176    | –      |        |       |        |         |         |         |        |       |        |       |    |    |    |
| 5. CELF Expressive Language Index              | -.054  | -.015 | .369*   | .509** | –      |       |        |         |         |         |        |       |        |       |    |    |    |
| 6. PPVT-4 SS                                   | -.399* | .145  | .017    | .404*  | .440*  | –     |        |         |         |         |        |       |        |       |    |    |    |
| 7. GFTA-2 SS                                   | -.14   | .207  | .589**  | .367*  | .564** | .449* | –      |         |         |         |        |       |        |       |    |    |    |
| 8. % inconsistency                             | -.304  | .221  | -.557** | -.123  | -.101  | .003  | -.31   | –       |         |         |        |       |        |       |    |    |    |
| 9. PVC                                         | .458** | -.082 | .818**  | .124   | .218   | .046  | .440*  | -.576** | –       |         |        |       |        |       |    |    |    |
| 10. PCC                                        | .506** | -.007 | .726**  | .183   | .555** | .246  | .579** | -.516** | .699**  | –       |        |       |        |       |    |    |    |
| 11. % lexical stress errors                    | -.413* | .039  | -.795** | -.059  | -.11   | .075  | -.411* | .544**  | -.938** | -.600** | –      |       |        |       |    |    |    |
| 12. Forward digit span SS                      | -.049  | -.047 | .301    | .419*  | .602** | .279  | .529** | -.520** | .237    | .408*   | -.171  | –     |        |       |    |    |    |
| 13. % correct treated pseudowords at baseline  | .577** | -.014 | .405*   | -.017  | .293   | .093  | .184   | -.284   | .452**  | .527**  | -.414* | .245  | –      |       |    |    |    |
| 14. % correct untreated real words at baseline | .437*  | .072  | .283    | .22    | .378*  | .151  | .231   | -.382*  | .3      | .521**  | -.24   | .343  | .560** | –     |    |    |    |
| 15. Dose-frequency <sup>b</sup>                | .068   | .12   | .034    | .218   | -.12   | -.057 | -.006  | .299    | .102    | -.076   | -.156  | -.182 | -.012  | -.125 | –  |    |    |

**Note.** Highlighted values indicate highly correlated independent variables ( $r \geq .8$ ). CELF = Clinical Evaluation of Language Fundamentals; PPVT-4 = Peabody Picture Vocabulary Test–Fourth Edition (Dunn & Dunn, 2007); SS = standard score; GFTA-2 = Goldman-Fristoe Test of Articulation–2 (Goldman & Fristoe, 2000); PVC = percentage of vowels correct; PCC = percentage of consonants correct.

<sup>a</sup> 0 = male, 1 = female. <sup>b</sup> 0 = four-times per week ReST, 1 = twice-weekly ReST.

\* $p < .05$ . \*\* $p < .01$ .

Supplemental material, Ng et al., “Predicting Treatment Outcomes in Rapid Syllable Transition Treatment: An Individual Participant Data Meta-Analysis,” *JSLHR*, [https://doi.org/10.1044/2022\\_JSLHR-21-00617](https://doi.org/10.1044/2022_JSLHR-21-00617)

## References

- Dunn, L. M., & Dunn, D. M. (2007). *Peabody Picture Vocabulary Test—Fourth Edition*. Pearson.
- Goldman, R., & Fristoe, M. (2000). *Goldman-Fristoe Test of Articulation—Second Edition*. American Guidance Service.
