# Supplementary material
Source: publisher figshare collection journal article supplement (https://asha.figshare.com/articles/dataset/_/19611714)
Supplement: Supplementary file 4 [file 1]

**Supplemental Material S4. Suggested pretreatment assessment protocol.**

| Category          | Assessment tool                                                    | Required measure                                                                |
|-------------------|--------------------------------------------------------------------|---------------------------------------------------------------------------------|
| Oral motor skills | Oral and Speech Motor Control Protocol <sup>a</sup>                | Oral function score                                                             |
| Speech            | GFTA-3 Sounds-In-Words                                             | SS                                                                              |
|                   | Single Word Test of Polysyllables <sup>b</sup>                     | PVC<br>PCC                                                                      |
|                   | DEAP Inconsistency Assessment                                      | % inconsistency                                                                 |
| Language          | CELF-P3 or CELF-4/CELF-5                                           | Receptive Language Index <sup>c</sup><br>Expressive Language Index <sup>c</sup> |
|                   | PPVT-5                                                             | PPVT-5 SS                                                                       |
| Working memory    | CTOPP/CTOPP-2 Memory for Digits or<br>TAPS-3 Number Memory Forward | Forward digit span SS                                                           |

*Note 1.* This table includes current versions of the tools. Previous versions were used in the studies included in the paper.

*Note 2.* GFTA-3 = Goldman-Fristoe Test of Articulation–Third Edition (Goldman & Fristoe, 2015); SS = standard score; PVC = percentage of vowels correct; PCC = percentage of consonants correct; DEAP = Diagnostic Evaluation of Articulation and Phonology (Dodd et al., 2006); CELF-P3 = Clinical Evaluation of Language Fundamentals Preschool–Third Edition, Australian and New Zealand Standardised Edition (Wiig et al., 2021); CELF-4 = Clinical Evaluation of Language Fundamentals–Fourth Edition, Australian Standardised Edition (Semel et al., 2006); CELF-5 = Clinical Evaluation of Language Fundamentals–Fifth Edition, Australian and New Zealand Standardised Edition (Wiig et al., 2017); PPVT-5 = Peabody Picture Vocabulary Test–Fifth Edition (Dunn, 2018); CTOPP = Comprehensive Test of Phonological Processing (Wagner et al., 1999); CTOPP-2 = Comprehensive Test of Phonological Processing–Second Edition (Wagner et al., 2013); TAPS-3 = Test of Auditory Processing Skills–Third Edition (Martin & Brownell, 2005).

<sup>a</sup>Robbins & Klee, 1987. <sup>b</sup>Gozzard et al., 2006. <sup>c</sup>Receptive and Expressive Language Index scores are standard scores.

## Outcome Measures

Data should be collected for a child’s performance on treated pseudowords and untreated real words at baseline, 1 week post-treatment, and 4 weeks post-treatment.

Performance is defined by the percentage of responses perceptually judged to be correct (i.e., all of correct sounds, stress patterns, and smooth transitions between syllables).

Readers are recommended to look at the ReST website for more information on creating and collecting treatment and outcome data.

[www.rest.sydney.edu.au](http://www.rest.sydney.edu.au)

## References

- Dodd, B., Hua, Z., Crosbie, S., Holm, A., & Ozanne, A. (2006). *Diagnostic Evaluation of Articulation and Phonology*. The Psychological Corporation.
- Dunn, D. M. (2018). *Peabody Picture Vocabulary Test—Fifth Edition*. Pearson.
- Goldman, R., & Fristoe, M. (2015). *Goldman-Fristoe Test of Articulation—Third Edition*. Pearson.
- Gozzard, H., Baker, E., & McCabe, P. (2006). Children’s production of polysyllabic words. *ACQuiring Knowledge in Speech, Language and Hearing*, 8(3), 113–116.
- Martin, N. A., & Brownell, R. (2005). *Test of Auditory Processing Skills—Third Edition*. Academic Therapy Publications.
- Robbins, J., & Klee, T. (1987). Clinical assessment of oropharyngeal motor development in young children. *Journal of Speech and Hearing Disorders*, 52, 271–277.  
<https://doi.org/10.1044/jshd.5203.271>
- Semel, E., Wiig, E. H., & Secord, W. A. (2006). *Clinical Evaluation of Language Fundamentals, Australian Standardised Edition—Fourth Edition*. Pearson.
- Wagner, R. K., Torgesen, J. K., & Rashotte, C. A. (1999). *Comprehensive Test of Phonological Processing*. Pro-Ed.
- Wagner, R. K., Torgesen, J. K., Rashotte, C. A., & Pearson, N. A. (2013). *Comprehensive Test of Phonological Processing—Second Edition*. Pro-Ed.
- Wiig, E. H., Secord, W. A., & Semel, E. (2021). *Clinical Evaluation of Language Fundamentals Preschool, Australian and New Zealand Standardised Edition—Third Edition*. Pearson.
- Wiig, E. H., Semel, E., & Secord, W. A. (2017). *Clinical Evaluation of Language Fundamentals, Australian and New Zealand—Fifth Edition*. Pearson.
